# Supplementary material for: Screening and Identification of ssDNA Aptamers for Low-Density Lipoprotein (LDL) Receptor-Related Protein 6
Source: MDPI journal article supplement (doi:10.3390/molecules28093838), 2023-04-30
Supplement: s1 [file s1]

**Table S1.** Sequence information of the four mutant aptamers.

| Name       | Sequence (5'-3')                                                                                                  |
|------------|-------------------------------------------------------------------------------------------------------------------|
| MutLRP6-A1 | AGCAGCACAGAGGTCAGATGCCGCAGGCAG <u>TTTT</u> CATTAGTCTCTATCCGTGACGGTATG<br>CCTATGCGT <u>TTTT</u> ICCGTGAA           |
| MutLRP6-A2 | AGCAGCAC <u>TT</u> AGGTCAGATGGCCACATTAGTCTCACCACCTACCT <u>TTTT</u> ICCTACCGCCGCC<br>CTATGCGTGCTACCGTGAA           |
| MutLRP6-A3 | AGCAGCACAGAGG <u>T</u> A <u>TTT</u> TGGCAGCTAAGCAGGCGGCTCACAAAACCATTTCGCATGCGG<br>CCCTATGCGTGCT <u>TTT</u> TGTGAA |
| MutLRP6-A4 | AGCAGCACAGAGGTCAGATGCGT <u>TTT</u> TGCCTAT <u>TTTT</u> ATGACACAATCTTTTGGAGCGTAAC<br>CTATGCGTGCTACCGTGAA           |

**Note:** The underlined parts are mutant nucleotides.

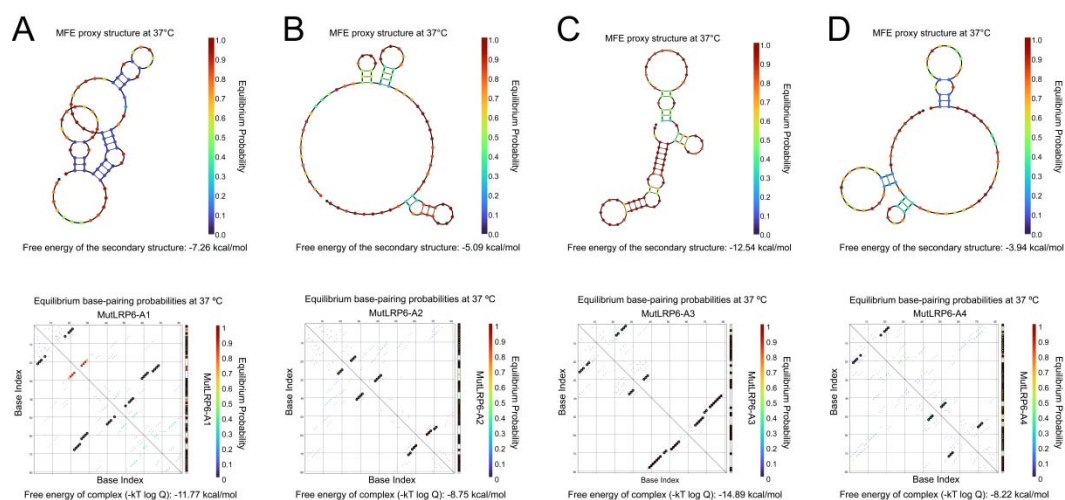

**Figure S1.** Secondary structure prediction of mutant candidate aptamers. (A–D) The secondary structures of MutLRP6-A1~MutLRP6-A4 were predicted by the NUPACK software.

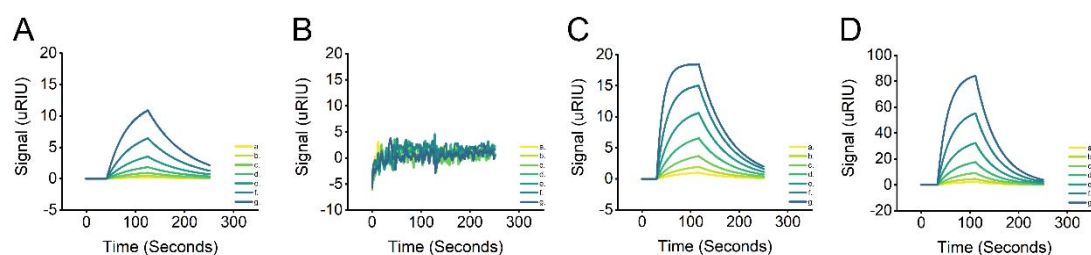

**Figure S2.** SPR characterizes mutant candidate aptamers' affinity and specificity. (A–D) respectively showed the SPR response spectrums of the binding of MutLRP6-A1~MutLRP6-A4 to LRP6.

**Table S2.** The binding kinetic parameters of mutant candidate aptamers and LRP6 were determined via SPR.

| Name       | Bmax<br>([Signal (uRIU)]) | ka (1/ (M · s))    | kd (1/s)           | K <sub>D</sub> (mol/L) | U-value: ka/kd (%) |
|------------|---------------------------|--------------------|--------------------|------------------------|--------------------|
| MutLRP6-A1 | 26.8                      | $1.13 \times 10^4$ | $1.29 \times 10^2$ | $1.13 \times 10^6$     | 9.9                |
| MutLRP6-A2 | -                         | -                  | -                  | -                      | -                  |
| MutLRP6-A3 | 23.43                     | $6.21 \times 10^4$ | $1.66 \times 10^2$ | $2.68 \times 10^7$     | 6.2                |
| MutLRP6-A4 | 159.22                    | $2.60 \times 10^4$ | $2.20 \times 10^2$ | $8.47 \times 10^7$     | 3.4                |

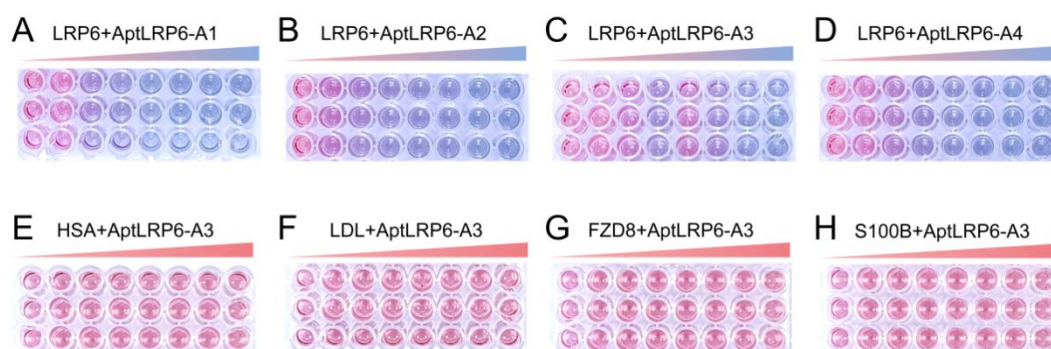

**Figure S3.** The affinities of candidate aptamers were verified using the gold nanoparticles (AuNPs) colorimetric method. **(A–D)** Color change of AuNPs solution after co-incubation of candidate aptamers AptLRP6-A1~AptLRP6-A4 with LRP6 protein, respectively. With the increase in the candidate aptamer concentration, the color of the AuNPs solution gradually changed from burgundy to blue. **(E–H)** Color change of AuNPs solution after co-incubation of candidate aptamer AptLRP6-A3 with control proteins HSA, LDL, FZD8, and S100B, respectively.

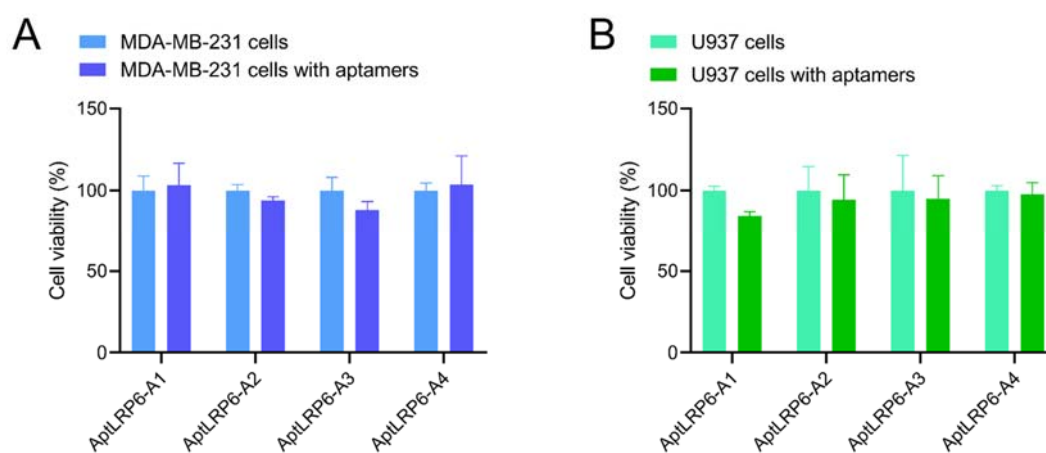

**Figure S4.** Effect of four candidate aptamers on cell growth. **(A)** Cell viability of 1  $\mu\text{mol/L}$  candidate aptamers co-incubated with MDA-MB-231 cells for 24 h; **(B)** Cell viability of 1  $\mu\text{mol/L}$  candidate aptamers co-incubated with U937 cells for 24 h.
